# Supplementary material for: Accumulation of C-CTX1 in Muscle Tissue of Goldfish (Carassius auratus) by Dietary Experience
Source: MDPI journal article supplement (doi:10.3390/ani11010242), 2021-01-19

## Supplementary data S1

Chromatogram obtained after the LC-MS/MS analysis [1] in MRM mode of **A)** C-CTX1 pure standard (5 ng / mL); **B)** C-CTX1 detected in the *Seriola* sp. Along with the C-CTX1 peak, some traces of C-CTX1-Me and interferences, which could be erroneously identified as other CTXs from the P-CTXs family, were found.

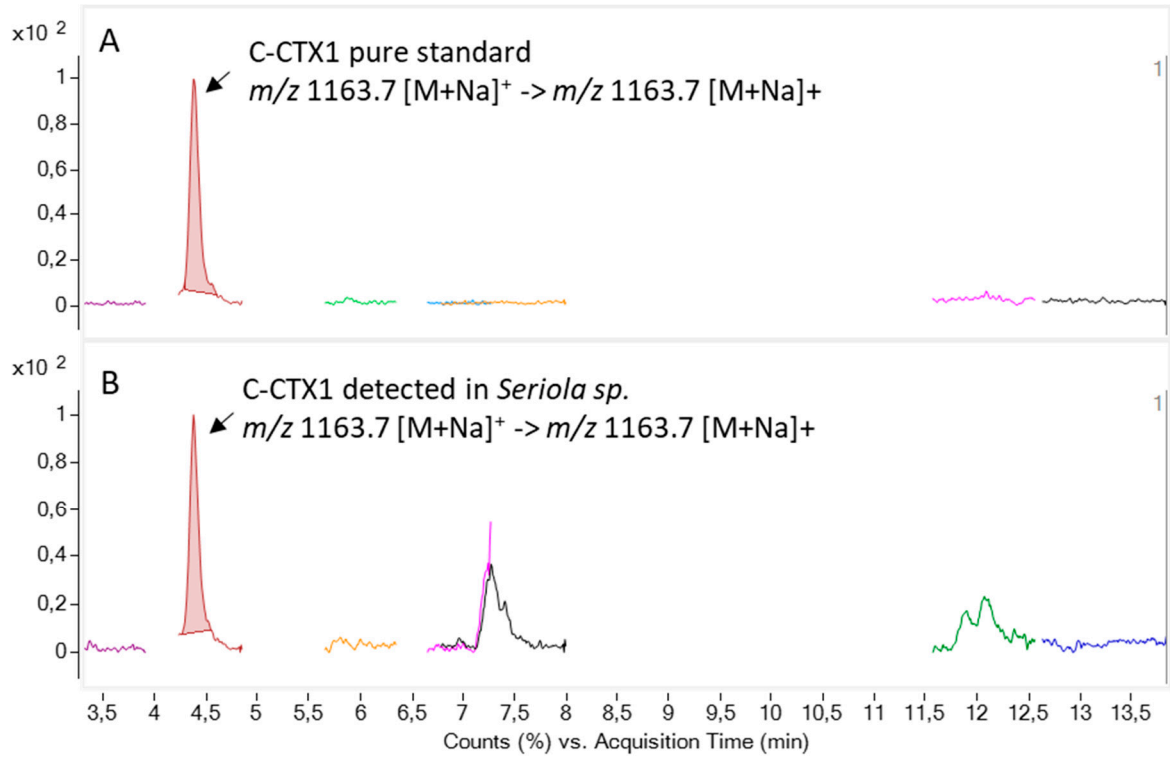

## Supplementary data S2

Outlined research design.

|                     |                                                                                                                   |
|---------------------|-------------------------------------------------------------------------------------------------------------------|
| <b>Objectives</b>   | To describe the symptomatology in goldfish ( <i>Carassius auratus</i> ) associated to ciguatoxin (CTX) ingestion. |
|                     | To estimate the time required for CTXs to be accumulated in fish muscle.                                          |
| <b>Fish species</b> | Goldfish which lives in a naturally CTX free environment.                                                         |

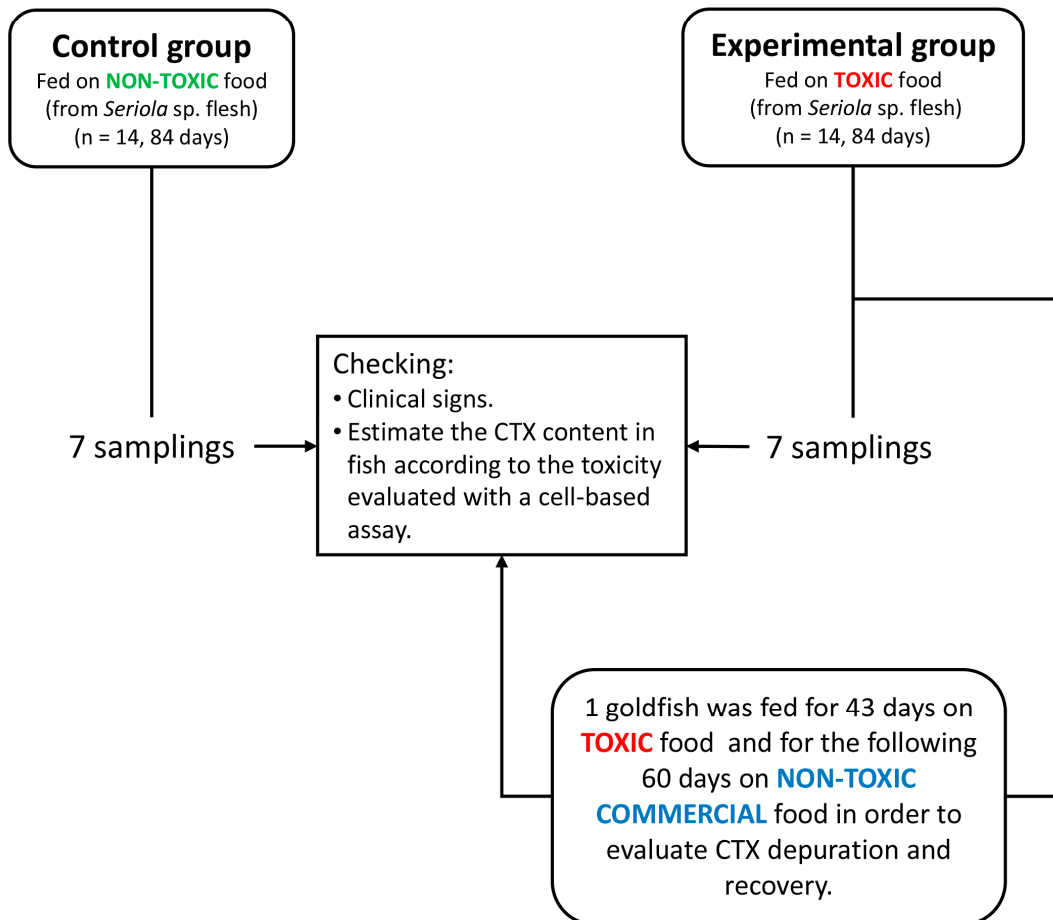

Supplement: s1 [file s1]
